# Supplementary material
Source: PubMed Central journal article supplement (PMC4516015)
Supplement: i1552-5783-56-8-4725-s01.pdf [file i1552-5783-56-8-4725-s01.pdf]

**Table S1. a and b wave amplitudes of scotopic ERG in  $\mu\text{V}$  measured by scotopic ERG**

| Month | WT | Caspase12 <sup>-/-</sup> | T17M | T17M<br>Caspase12 <sup>-/-</sup> | Ratio:<br>T17M:<br>WT | Ratio:<br>T17M<br>Caspase12 <sup>-/-</sup><br>:T17M | Ratio:<br>T17M<br>Caspase12 <sup>-/-</sup><br>:WT |
|-------|----|--------------------------|------|----------------------------------|-----------------------|-----------------------------------------------------|---------------------------------------------------|
|-------|----|--------------------------|------|----------------------------------|-----------------------|-----------------------------------------------------|---------------------------------------------------|

**a- wave amplitudes**

|   |        |         |         |        |       |       |       |
|---|--------|---------|---------|--------|-------|-------|-------|
| 1 | 395±19 | 372±6.4 | 97±11   | 225±15 | 0.244 | 2.327 | 0.569 |
| 2 | 325±15 | 370±13  | 108±7.8 | 166±13 | 0.330 | 1.546 | 0.511 |
| 3 | 329±16 | 328±26  | 76±10   | 161±11 | 0.230 | 2.123 | 0.489 |

**b- wave amplitudes**

|   |          |          |          |          |       |       |       |
|---|----------|----------|----------|----------|-------|-------|-------|
| 1 | 778.6±27 | 758.4±43 | 318.2±37 | 511.1±22 | 0.408 | 1.606 | 0.656 |
| 2 | 719.5±17 | 772.2±25 | 366.8±32 | 592.2±47 | 0.509 | 1.614 | 0.823 |
| 3 | 762.2±13 | 696.2±35 | 336.2±33 | 466.7±35 | 0.441 | 1.388 | 0.612 |

**Table S2. Average ONL thickness in superior and inferior retinas in microns measured by SD-OCT**

| Month | WT | Caspase12 <sup>-/-</sup> | T17M | T17M<br>Caspase12 <sup>-/-</sup> | Ratio:<br>T17M:<br>WT | Ratio:<br>T17M<br>Caspase12 <sup>-/-</sup><br>:T17M | Ratio:<br>T17M<br>Caspase12 <sup>-/-</sup><br>:WT |
|-------|----|--------------------------|------|----------------------------------|-----------------------|-----------------------------------------------------|---------------------------------------------------|
|-------|----|--------------------------|------|----------------------------------|-----------------------|-----------------------------------------------------|---------------------------------------------------|

### Superior Retina

|   |            |            |            |            |          |          |          |
|---|------------|------------|------------|------------|----------|----------|----------|
| 1 | 63.96±0.30 | 63.77±0.27 | 37.64±1.76 | 46.70±1.17 | 0.588493 | 1.240701 | 0.730144 |
| 2 | 61.02±0.46 | 58.68±0.37 | 37.41±1.03 | 46.16±1.05 | 0.613078 | 1.233895 | 0.756473 |
| 3 | 59.32±0.52 | 57.99±0.11 | 23.11±3.16 | 38.16±2.59 | 0.424477 | 1.515488 | 0.643291 |

### Inferior Retina

|   |           |           |           |           |          |          |          |
|---|-----------|-----------|-----------|-----------|----------|----------|----------|
| 1 | 63.4±0.69 | 63.3±0.28 | 35.8±1.79 | 45.4±0.96 | 0.564867 | 1.26907  | 0.716856 |
| 2 | 60.7±0.34 | 58.3±0.34 | 27.4±1.22 | 42.9±2.5  | 0.452208 | 1.563047 | 0.706823 |
| 3 | 59.2±0.52 | 58±0.11   | 18.6±1.29 | 33.4±3.58 | 0.313745 | 1.799785 | 0.564674 |

**Table S3. Apoptosis associated markers in P30 retinas**

| Proteins | WT | Caspase12 <sup>-/-</sup> | T17M | T17M<br>Caspase12 <sup>-/-</sup> | Ratio:<br>T17M:<br>WT | Ratio:<br>T17M<br>Caspase12 <sup>-/-</sup><br>:T17M | Ratio:<br>T17M<br>Caspase12 <sup>-/-</sup><br>:WT |
|----------|----|--------------------------|------|----------------------------------|-----------------------|-----------------------------------------------------|---------------------------------------------------|
|----------|----|--------------------------|------|----------------------------------|-----------------------|-----------------------------------------------------|---------------------------------------------------|

**Western blot:** Normalized protein in arbitrary units (a.u)

|             |             |             |             |             |       |       |       |
|-------------|-------------|-------------|-------------|-------------|-------|-------|-------|
| Bax         | 0.22±0.047  | 0.96±0.23   | 5.4±0.17    | 1.4±0.09    | 24.54 | 0.26  | 6.36  |
| Traf2       | 0.025±0.001 | 0.031±0.004 | 0.3±0.08    | 0.029±0.007 | 12    | 0.096 | 1.16  |
| Calpastatin | 0.56±0.078  | 0.37±0.17   | 0.038±0.016 | 0.17±0.21   | 0.067 | 4.47  | 0.3   |
| Caspase 12  | 0.227±0.048 | -----       | 0.70±0.123  | -----       | 6     | ----- | ----- |
| NFKB        | 0.398±0.22  | 0.442±0.02  | 1.2±0.03    | 0.968±0.02  | 3.01  | 0.806 | 2.43  |
| Caspase 3   | 0.095±0.03  | 0.219±0.01  | 1.61±0.1    | 0.942±0.2   | 16.9  | 0.585 | 9.9   |

**Assay:** Fluorescence and Luminescence in arbitrary units (a.u)

|                    |            |            |            |            |      |      |      |
|--------------------|------------|------------|------------|------------|------|------|------|
| Calpain Activation | 58541±2176 | 58541±1444 | 73255±2405 | 59698±2008 | 1.25 | 0.81 | 1.01 |
| Caspase 3/7        | 206±28.5   | 96.8±6.5   | 636±53.6   | 312±2.89   | 3.08 | 0.49 | 1.51 |

**qRT-PCR:** Gene expression, fold change

|     |           |            |           |          |      |      |      |
|-----|-----------|------------|-----------|----------|------|------|------|
| Bax | 1.13±0.13 | 0.789±0.03 | 1.23±0.05 | 1.1±0.05 | 1.08 | 0.89 | 0.97 |
|-----|-----------|------------|-----------|----------|------|------|------|

**Caspase-12**

| Time Point | WT        | T17M      | Ratio: T17M:WT |
|------------|-----------|-----------|----------------|
| P12        | 1.12±0.16 | 1.18±0.14 | 1.05           |
| P18        | 1.08±0.17 | 6.11±0.97 | 5.65           |
| P21        | 1.19±0.30 | 4.90±1.37 | 4.11           |
| P25        | 2.05±0.62 | 5.82±0.98 | 2.83           |
